# Supplementary material for: Estrogen receptor beta as a novel target of androgen receptor action in breast cancer cell lines
Source: PubMed Central journal article supplement (PMC3978907; doi:10.1186/bcr3619), 2014-02-19
Supplement: bcr3619-S2.pdf [file bcr3619-S2.pdf]

MCF-7

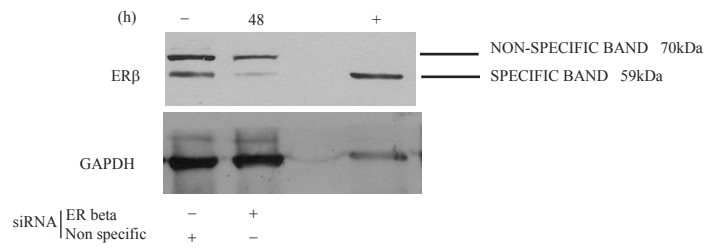

**Additional file 2, Figure S2. Knockdown of ER beta in MCF-7 cells.**

Western blot analysis for ER beta in MCF-7 cells transfected with non-specific siRNA (-) or targeted against human ER beta (100 nM) for 48h. GAPDH was used as a loading control. LNCaP (+) was used for positive control.
